# Supplementary material
Source: ML conference proceedings conference paper supplement (https://openreview.net/forum?id=zEm6hF97Pz)
Supplement: supplementary_material [file attachment]

540 **A Notation summary**

---

|                                                 |                                                                                                                                                                                       |
|-------------------------------------------------|---------------------------------------------------------------------------------------------------------------------------------------------------------------------------------------|
| $n$                                             | Number of steps of the streaming linear query (SGD steps or FL rounds)                                                                                                                |
| $m$                                             | Total number of records (examples or users) in the database/dataset                                                                                                                   |
| $b$                                             | Minimum separation between participations; $b = 1$ allows participation in every step                                                                                                 |
| $k$                                             | The maximum number of times any user might participate in training                                                                                                                    |
| $d$                                             | Dimension of per-step user contributions (e.g., model size)                                                                                                                           |
| $\mathbf{x}_i \in \mathbb{R}$ or $\mathbb{R}^d$ | Sum of per-example gradients (or per-user model updates) on step $i$                                                                                                                  |
| $\mathbf{x} \in \mathbb{R}^{n \times d}$        | Stream of inputs $\mathbf{x}_i$ , equiv. matrix with rows $\mathbf{x}_i$ (so $\mathbf{x}_i = \mathbf{x}_{[i,:]}$ )                                                                    |
| $\zeta$                                         | Clipping norm that limits the size of per-example contributions to $\mathbf{x}_i$                                                                                                     |
| $\pi \subseteq [n]$                             | Participation pattern, the set of steps that an example participates in                                                                                                               |
| $\Pi$                                           | Participation schema, set of sets of steps (set of all $\pi$ ) an example could participate in                                                                                        |
| $\mathcal{D}$                                   | $= \{\mathbf{x} - \tilde{\mathbf{x}} \mid (\mathbf{x}, \tilde{\mathbf{x}}) \in \mathbf{N}\}$ , the set of deltas between neighboring input streams $\mathbf{x}, \tilde{\mathbf{x}}$ . |
| $\mathcal{D}$                                   | Corners of $\mathcal{D}$ when assumed to be a polytope, $\mathcal{D} = \text{conv}(\mathcal{D})$ .                                                                                    |
| $(k, b)$ -participation                         | participation schema $\Pi$ with at most $k$ participations, separated by exactly $b$ .                                                                                                |
| $b$ -min-sep-participation                      | Relaxation of of $(k, b)$ -participation where participations have separation at least $b$                                                                                            |
| $\mathbf{A} \in \mathbb{R}^{n \times n}$        | Lower-triangular linear query matrix to be factorized as $\mathbf{A} = \mathbf{BC}$                                                                                                   |
| $\mathbf{M}^\dagger$                            | Moore-Penrose pseudoinverse of matrix $\mathbf{M}$                                                                                                                                    |
| $\mathbf{M}^\top$                               | Transpose of $\mathbf{M}$                                                                                                                                                             |
| $\mathbf{M}_{[i,j]}$                            | The $(i, j)$ <sup>th</sup> entry of matrix $\mathbf{A}$                                                                                                                               |
| $\mathbf{M}_{[i,:]}$ and $\mathbf{M}_{[:,j]}$   | The $i$ <sup>th</sup> row and $j$ <sup>th</sup> column of $\mathbf{M}$ (numpy-style indexing)                                                                                         |
| $\text{conv}(S)$                                | Convex hull of the set $S$                                                                                                                                                            |
| $[n]$                                           | $= \{1, \dots, n\}$                                                                                                                                                                   |
| $\ \mathbf{X}\ _F$                              | The Frobenius norm of a matrix $\mathbf{X}$                                                                                                                                           |

---

Table 1: Summary of notation

541 **B Empirical evaluation of banded matrices**

542 Table 2 compares the matrix mechanisms studied under different participation patterns but normalized  
 543 to have sensitivity  $\text{sens}(\mathbf{C}) = 1$  under  $(k=6, b=342)$ -participation. The sensitivity under single  
 544 participation  $k = 1$  is lowest as expected. With column normalization, sensitivity is also 1 under  
 545  $b \geq 342$ -min-sep-participation. We make the following observations:

- 546 • For the MF mechanisms, column normalization hurts RMSE for  $(k, b)$ -participation (as it is  
 547 an additional constraint), but actually improves RMSE under  $b$ -min-sep-participation.
- 548 • We conjecture that the  $(k, b)$ -participation optimized matrices (MF without column normal-  
 549 ization) are optimal for the prefix-sum workload<sup>6</sup>; With this in mind, we see there is at most

<sup>6</sup>This conjecture is not trivially true, as we enforce a non-negativity or orthogonality constraint; see Choquette-Choo et al. [15, Appendix I.3]. Hence the conjecture is that these constraints are already satisfied by the optimal matrix for this workload.

| Mechanism                | Matrix          |                               | Sensitivity |                     |                                 | Error                                 |                                                   |
|--------------------------|-----------------|-------------------------------|-------------|---------------------|---------------------------------|---------------------------------------|---------------------------------------------------|
|                          | Bands $\hat{b}$ | Equal column norms?<br>(Ours) | $k=1$ [17]  | $(k=6, b=342)$ [15] | $b \geq 342$ -min-sep<br>(Ours) | (A) RMSE under<br>$(k=6, b=342)$ [15] | (B) RMSE under<br>$b \geq 342$ -min-sep<br>(Ours) |
| OPTIMAL TREEAGG [29, 34] | -               | F                             | 0.32        | 1.00                | 1.00                            | 1.53                                  | 1.53                                              |
| DP-SGD [1]               | 1               | T                             | 0.41        | 1.00                | 1.00                            | 9.63                                  | 9.63                                              |
| MF ( $b=128$ ) (Ours)    | 128             | F                             | 0.52        | 1.00                | 1.04                            | 1.23                                  | 1.29                                              |
| MF ( $b=128$ ) (Ours)    | 128             | T                             | 0.41        | 1.00                | 1.00                            | 1.27                                  | 1.27                                              |
| MF ( $b=342$ ) (Ours)    | 342             | F                             | 0.52        | 1.00                | 1.04                            | 1.04                                  | 1.08                                              |
| MF ( $b=342$ ) (Ours)    | 342             | T                             | 0.41        | 1.00                | 1.00                            | 1.05                                  | <b>1.05</b>                                       |
| MF [15]                  | -               | F                             | 0.50        | 1.00                | $\leq 1.15$                     | <b>1.00</b>                           | 1.15                                              |
| MF [15]                  | -               | T                             | 0.41        | 1.00                | $\leq 1.13$                     | 1.01                                  | 1.14                                              |

Table 2: A comparison of matrix mechanisms for  $n = 2052$  under different participation patterns. **Banded matrices are near-optimal under  $(k, b)$ -participation and best under  $b$ -min-sep-participation.** Each error is computed under the indicated measure of sensitivity. Thus, the error in column (B) can be obtained by multiplying the error in column (A) by the corresponding entry under  $b \geq 342$  sensitivity.

550 a small increase in RMSE for switching to the more challenging  $b$ -min-sep-participation  
551 schema ( $1.00 \rightarrow 1.05$ ). If (as we further conjecture) the optimal matrices for prefix-sum in  
552 fact are  $k$ -banded, the gap is even smaller (at most  $1.04 \rightarrow 1.05$ ). Hence, at least for the  
553 prefix-sum workload **A**, there is limited room for improvement in developing optimization  
554 procedures that directly exploit  $b$ -min-sep-participation.  
555 • Using fewer than  $b$  bands does degrade performance on the RMSE metric, with DP-SGD  
556 being the extreme case, yielding prefix sum estimates almost  $10\times$  worse than the MF  
557 mechanisms.  
558 • The results of Denisov et al. [17] imply that the binary-tree **C** matrix can in fact be used  
559 in the online setting, with the Moore-Penrose pseudo-inverse giving the optimal decoder  
560 for RMSE [15], corresponding to the ‘full’ estimator of Honaker [29]. We include this in  
561 the table as a baseline, and see that it is in general outperformed by our MF mechanisms by  
562 about  $1.5\times$  in RMSE.

## 563 C Example structures of MF

564 Figs. 6 and 7 show the structure of some of the key matrix factorization approaches considered in this  
565 work. One can immediately see the impact of the  $k$ -participation schema in the optimal matrices,  
566 in particular for the non-banded MULTI-EPOCH MF matrices (the two top-right matrices), where  
567 **C** contains diagonals of negative entries separated by  $b$  steps. In the bottom two rows, we see that  
568 requiring equal column norms (“EN-” for equal norms) has a relatively minor impact on the structure  
569 of the matrices.

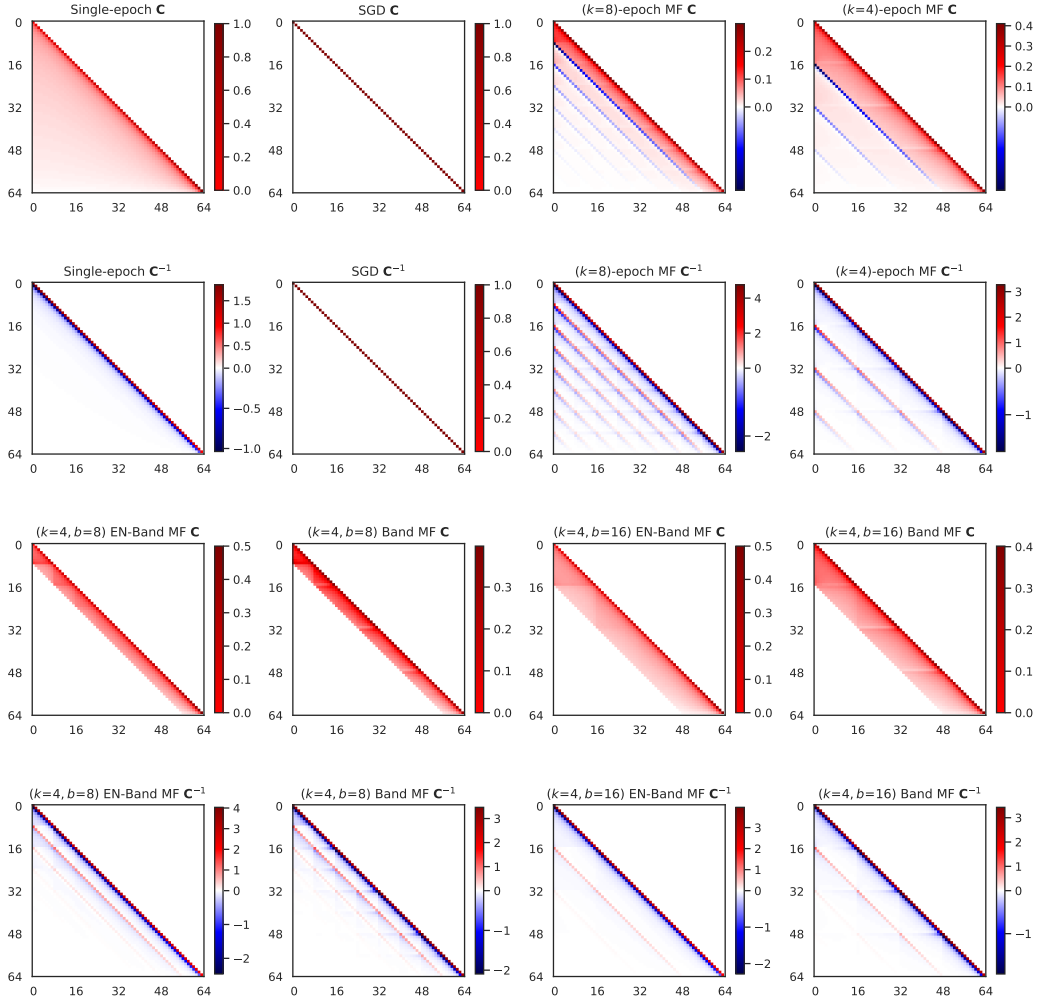

Figure 6: Factorizations for  $n = 64$  of the prefix-sum workload ( $\mathbf{A}$  taken to be the lower-triangular matrix of 1s). For each factorization  $\mathbf{A} = \mathbf{BC}$ , we show  $\mathbf{C}$  and its inverse  $\mathbf{C}^{-1}$ , as the inverse is the matrix used in noise generation. Single-epoch is the approach of Denisov et al. [17], SGD is simply the identity matrix  $\mathbf{I}$  (shown for completeness), and  $(k=8)$ -epoch MF and  $(k=4)$ -epoch are the MULTI-EPOCH MF approach of Choquette-Choo et al. [15] for 8 and 4 epochs, respectively. For our banded matrices (3rd and 4th rows), we fix 4 epochs ( $b = 16$ ), and show  $\hat{b}=8$  and  $\hat{b}=16$  bands, with column normalization (“EN-”) and without.

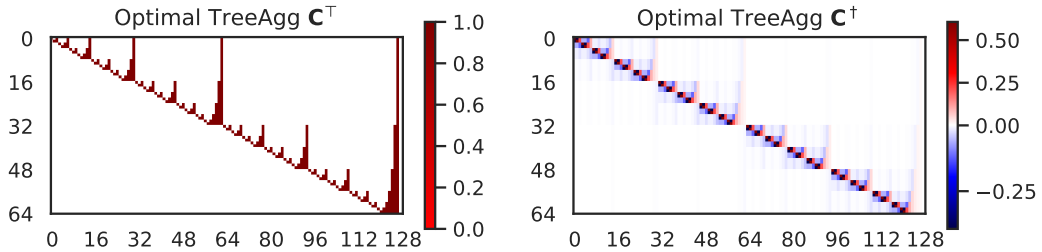

Figure 7: The transpose of binary-tree encoder matrix  $\mathbf{C}_{\mathcal{T}}$ , and its pseudoinverse  $\mathbf{C}_{\mathcal{T}}^{\dagger}$ , which corresponds to the “full” or optimal decoder of Honaker [29]. This is the matrix used in OPTIMAL TREEAGG in Fig. 5[a].

570 **D Algorithms and Analysis for Sec. 3**

571 **D.1 Algorithms**

---

**Algorithm 2** (VECSSENS): Maximum of  $\langle \mathbf{v}, \mathbf{u} \rangle$  where  $\mathbf{u}$  is a vector in the  $\ell_\infty$  unit ball satisfying  $\Pi_b$ .

---

**Inputs:** min-separation  $b$ , vector  $\mathbf{v}$ , max participations  $k$

Initialize  $F \in \mathbb{R}^{n \times k}$

**for**  $m = 1, \dots, k$  **do**

**for**  $i = n, \dots, 1$  **do**       $\triangleright$  We use the convention that  $F[s, t] = 0$  if  $s, t$  are out-of-bounds.

$$F[i, m] = \max \left( \mathbf{v}_i + F[i + b, m - 1], F[i + 1, m] \right)$$

**return**  $\sqrt{F[1, k]}$

---



---

**Algorithm 3** Efficient sensitivity upper bound for  $b$ -min-sep-participation

---

**Inputs:** min-separation  $b$ , matrix  $\mathbf{X}$ , max participations  $k$

Initialize  $F \in \mathbb{R}^{n \times k}$ ,  $\mathbf{v} \in \mathbb{R}^n$ .

**for**  $j = 1, \dots, n$  **do**

$$\mathbf{v}_i = \text{VECSSENS}(b, |\mathbf{X}_{[i,:]}|, k)$$

**return**  $\text{VECSSENS}(b, \mathbf{v}, k)$

---



---

**Algorithm 4** Efficient sensitivity calculation for  $b$ -min-sep-participation, assuming  $\mathbf{X}$  is  $b$ -banded.

---

**Inputs:** min-separation  $b$ ,  $b$ -banded matrix  $\mathbf{X}$ , max participations  $k$ .

**return**  $\text{VECSSENS}(b, \text{diag}(\mathbf{X}), k)$

---

572 **D.2 Analysis**

573 **Proposition D.1.** *The sensitivity of  $\mathbf{C}$  for a given participation schema  $\Pi$  may be expressed as:*

$$\text{sens}_\Pi(\mathbf{C})^2 = \max_{\pi \in \Pi} \sup_{\mathbf{u} \in \mathcal{D}} \text{tr} \left( [\mathbf{P}_\pi \mathbf{C}^\top \mathbf{C} \mathbf{P}_\pi] [\mathbf{u} \mathbf{u}^\top] \right), \quad (6)$$

574 where  $\mathbf{P}_\pi$  represent the axis-aligned projection onto the set of rows indexed by  $\pi$ ; that is,  $\mathbf{P}_\pi[i, i] = 1$   
575 for  $i \in \pi$ , and 0 otherwise. Assuming that  $\mathcal{D}$  represents a set of matrices with rows bounded by  $\ell_2$   
576 norm 1, this can be upper bounded by:

$$\max_{\pi \in \Pi} \sum_{i, j \in \pi} |\mathbf{X}_{[i, j]}|.$$

577 where  $\mathbf{X} = \mathbf{C}^\top \mathbf{C}$ . This upper bound is tight when  $\mathbf{P}_\pi \mathbf{C}^\top \mathbf{C} \mathbf{P}_\pi \geq 0 \forall \pi \in \Pi$ , and is independent of  
578 the dimension  $d$  of the rows of  $\mathbf{u}$ .

579 *Proof.* Recall that  $\Pi$  determines the rows of  $\mathbf{u}$  which may be nonzero in the definition Eq. (2). Take  
580 some  $\mathbf{u} \in \mathcal{D}$ , an element of  $\mathbb{R}^{n \times d}$ , which therefore has nonzero rows only at some set of indices  
581  $\pi \in \Pi$ . Note, clearly  $\mathbf{u} = \mathbf{P}_\pi \mathbf{u}$ ,  $\mathbf{P}_\pi^\top = \mathbf{P}_\pi$ , and  $\mathbf{P}_\pi = \mathbf{P}_\pi \mathbf{P}_\pi$ .

582 Therefore

$$\begin{aligned} \|\mathbf{C} \mathbf{u}\|_F^2 &= \text{tr} \left( [\mathbf{C} \mathbf{P}_\pi \mathbf{u}]^\top \mathbf{C} \mathbf{P}_\pi \mathbf{u} \right) = \text{tr} \left( \mathbf{u}^\top \mathbf{P}_\pi^\top \mathbf{C}^\top \mathbf{C} \mathbf{P}_\pi \mathbf{u} \right) \\ &= \text{tr} \left( \mathbf{P}_\pi \mathbf{P}_\pi \mathbf{C}^\top \mathbf{C} \mathbf{P}_\pi \mathbf{P}_\pi \mathbf{u} \mathbf{u}^\top \right) = \text{tr} \left( [\mathbf{P}_\pi \mathbf{C}^\top \mathbf{C} \mathbf{P}_\pi] [\mathbf{P}_\pi \mathbf{u} \mathbf{u}^\top \mathbf{P}_\pi] \right) \\ &= \text{tr} \left( [\mathbf{P}_\pi \mathbf{C}^\top \mathbf{C} \mathbf{P}_\pi] [\mathbf{u} \mathbf{u}^\top] \right). \end{aligned} \quad (7)$$

583 This implies the statement Eq. (6) by the definition of sensitivity and neighboring in our setting.

Now, let  $\mathbf{X}_\pi := \mathbf{P}_\pi \mathbf{C}^\top \mathbf{C} \mathbf{P}_\pi$  be the matrix formed by zeroing out the rows and columns *not* indexed by  $\pi$  from  $\mathbf{X}$ . Assume that every  $\mathbf{u} \in \mathcal{D}$  has row norms bounded by 1. Expanding the trace in Eq. (6), writing  $x_{ij}$  for the elements of  $\mathbf{X}_\pi$  and  $\mathbf{u}_{[j,:]}$  for the  $j^{\text{th}}$  row of  $\mathbf{u}$ , we have

$$\text{tr}(\mathbf{X}_\pi \mathbf{u} \mathbf{u}^\top) = \sum_{i=1}^k \sum_{j=1}^k x_{ij} \langle \mathbf{u}_{[i,:]}, \mathbf{u}_{[j,:]} \rangle \leq \sum_{i=1}^k \sum_{j=1}^k |x_{ij}|$$

584 which yields the claimed bound. When  $\mathbf{X}_\pi$  is elementwise nonnegative, taking  $\mathbf{u}_{[i,:]} = \mathbf{u}_{[j,:]}$  for any  
585 unit vector shows the claimed tightness in this case.

586 □

587 **Remark.** This statement can be viewed as a partial extension of [15, Theorem G.1]. It does not  
588 imply every case handled there, but also implies results which cannot be derived from that Theorem.

589 *Proof of Thm. 2.* Conclusion (1) is implied by (2), noting that the conditions on  $\mathbf{C}$  imply that Algo-  
590 rithm 4 will return a value at most  $\kappa \sqrt{k'}$  in this setting.

591 For (2), let  $c \in \mathbb{R}^n$  with entries  $c_i = \|\mathbf{C}_{[:,i]}\|^2$  for  $i \in \{0, \dots, n-1\}$ . We have

$$\text{sens}_{\Pi}^1(\mathbf{C}) = \max_{\pi \in \Pi_b} \|\mathbf{C}u(\pi)\| = \max_{\pi \in \Pi_b} \left\| \sum_{i \in \pi} \mathbf{C}_{[:,i]} \right\| = \max_{\pi \in \Pi_b} \sqrt{\sum_{i \in \pi} c_i} \quad (8)$$

592 where  $u(\pi) \in \{0, 1\}^n$  is given by  $u(\pi)_i = 1$  if  $i \in \pi$  and 0 otherwise. The last equality follows from  
593 the orthogonality condition on sufficiently separated columns of  $\mathbf{C}$  trivially implied by bandedness.  
594 It is straightforward to verify the dynamic program of Algorithm 2 constructs a feasible  $\pi$  which  
595 attains the maximum. □

596 *Proof of Thm. 3.* Via Prop. D.1, the result follows from showing that Algorithm 3 outputs a value at  
597 least as large as  $\sum_{(i,j) \in \pi} |\mathbf{X}_{ij}|$  for any  $\pi \in \Pi_b$ . So let  $\hat{\pi}$  be an element of  $\Pi_b$ . Note that VECSENS is  
598 monotonically increasing in values of the vector  $\mathbf{v}$  if  $\mathbf{v}$  is nonnegative, and therefore Algorithm 3 is  
599 monotonically increasing in absolute values of  $\mathbf{X}$ . Therefore we will have our conclusion (3) if we  
600 can show that, for  $\mathbf{X}_{\hat{\pi}}$  the matrix formed by zeroing out all rows and columns of  $\mathbf{X}$  not indexed by  
601  $\hat{\pi}$ , Algorithm 3 returns the value  $\sum_{(i,j) \in \pi} |\mathbf{X}_{ij}|$ . Yet this is straightforward by the characterization  
602 of VECSENS as an oracle for computing the maximum of  $\langle \mathbf{v}, \mathbf{u} \rangle$ , where  $\mathbf{u}$  is a vector in the  $\ell_\infty$  unit  
603 ball. □

## 604 E Additional Analysis for Sec. 5

605 Recall that we use  $b$  instead of  $\hat{b}$  in this appendix since our sampling scheme enforces  $(k, b)$ -  
606 participation. Throughout this section, we slightly abuse notation by letting  $i \pmod b = b$  instead  
607 of 0 if  $i/b$  is integer.

### 608 E.1 Algorithms for Sampling

---

#### Algorithm 5 Sampling scheme for banded DP-MF

---

**Inputs:** Dataset  $D$ , sampling distribution  $\mathcal{S}$  over  $(2^{\lceil \tilde{m} \rceil})^k$ , noise standard deviation  $\sigma$ .  
 $D_1, \dots, D_b \leftarrow$  arbitrary partition of  $D$  such that  $\forall j : |D_j| = \tilde{m}$ .  
Let  $D_j = \{d_{j,1}, d_{j,2}, \dots, d_{j,\tilde{m}}\}$  for each  $j$ .  
**for**  $j = 1, 2, \dots, b$  **do**  
    Sample  $k$  sets to index  $D_j$  as  $(S_j, S_{b+j}, \dots, S_{(k-1)b+j}) \sim \mathcal{S}$ , with  $S_j \subseteq [\tilde{m}]$ .  
**for**  $i = 1, 2, \dots, n$  **do**  
    Let  $j = i \pmod b$ ; compute  $\mathbf{x}_i$  by querying  $\{d_{j,\ell} : \ell \in S_j\}$ .  
    Let  $\mathbf{x} = [\mathbf{x}_1, \dots, \mathbf{x}_n]^\top \in \mathbb{R}^{n \times d}$ , release  $\mathbf{C}\mathbf{x} + \mathbf{z}$  with each entry of  $\mathbf{z}_{[i,j]} \sim \mathcal{N}(0, \sigma^2)$ .  
    ▷ If  $\mathbf{C}$  is lower-triangular, results can also be released in streaming fashion

---

---

**Algorithm 6** Sequence of queries that bounds privacy of Algorithm 5
 

---

**Inputs:** Dataset  $\tilde{D} = \{d_1, d_2, \dots, d_{\tilde{m}}\}$ , sampling distribution  $\mathcal{S}$  over  $(2^{[\tilde{m}]})^k$ .  
 Sample  $(S_1, S_2, \dots, S_k) \sim \mathcal{S}$ .  
**for**  $i = 1, 2, \dots, k$  **do**  
    $\tilde{D}_i \leftarrow \{d_j : j \in S_i\}$ .  
   Perform (adaptively chosen) sensitivity  $\Delta$  query on  $\tilde{D}_i$  with noise  $\mathcal{N}(0, \sigma^2)$ .

---

**E.2 Proof for Thm. 4**

609 *Proof.* Consider two datasets  $D, D'$  that differ by an example contained in the partition subset  $D_j$ .  
 610 We argue about the privacy of  $\mathbf{C}\mathbf{x} + \mathbf{z}$ . For simplicity we assume  $j$  is such that  $(k-1)b + j \leq n$ ;  
 611 elements in  $D_j$  such that  $j$  does not satisfy this condition can potentially participate  $k-1$  times  
 612 instead of  $k$ , and in turn the privacy guarantee we can prove for these elements can only be stronger.  
 613  
 614 Since  $\mathbf{C}$  is  $b$ -banded, we can partition the rows of  $\mathbf{C}$  into  $k+1$  subsets

$$R_j, R_{b+j}, R_{2b+j} \dots R_{(k-1)b+j}, R_\emptyset,$$

615 where  $R_j$  (resp.  $R_{b+j}, R_{2b+j} \dots R_{(k-1)b+j}$ ) denotes the set of rows in  $\mathbf{C}$  for which the  $j$ th entry is  
 616 non-zero, and  $R_\emptyset = [n] \setminus (R_j \cup R_{b+j} \cup \dots)$ , i.e.,  $R_\emptyset$  are the rows not included in any of these sets,  
 617 i.e., rows of  $\mathbf{C}$  where entries  $j, b+j, \dots$  are all zero. The fact that  $\mathbf{C}$  is lower-triangular and  $b$ -banded  
 618 ensures that these subsets do not overlap, i.e., this is a valid partition as can be observed in Fig. 3.

619 Let  $\mathbf{C}_R$  denote  $\mathbf{C}$  restricted to the set of rows in  $R$ . From the perspective of an adversary dis-  
 620 tinguishing  $D$  from  $D'$ , each row of  $(\mathbf{C}\mathbf{x} + \mathbf{z})_{R_\emptyset} = \mathbf{C}_{R_\emptyset}\mathbf{x} + \mathbf{z}_{R_\emptyset}$  has a distribution indepen-  
 621 dent of whether  $D$  or  $D'$  was used. So it suffices to give privacy guarantees for outputting only  
 622  $(\mathbf{C}\mathbf{x} + \mathbf{z})_{R_j}, (\mathbf{C}\mathbf{x} + \mathbf{z})_{R_{b+j}}, \dots, (\mathbf{C}\mathbf{x} + \mathbf{z})_{R_{(k-1)b+j}}$ .

623 We can decompose rows  $R_j$  of  $\mathbf{C}\mathbf{x} + \mathbf{z}$  as follows:

$$(\mathbf{C}\mathbf{x} + \mathbf{z})_{R_j} = \mathbf{C}_{R_j}\mathbf{x} + \mathbf{z}_{R_j} = \mathbf{C}_{R_j}\mathbf{x}_j + \mathbf{C}_{R_j}\mathbf{x}_{-j} + \mathbf{z}_{R_j}. \quad (9)$$

624 Where  $\mathbf{x}_j$  denotes  $\mathbf{x}$  with all rows except  $j$  zeroed out, and  $\mathbf{x}_{-j}$  denotes  $\mathbf{x} - \mathbf{x}_j$ , i.e.,  $\mathbf{x}$  with row  $j$   
 625 zeroed out. By the  $b$ -banded property of  $\mathbf{C}$ ,  $\mathbf{C}_{R_j}\mathbf{x}_{-j}$  has 0 sensitivity to the examples in  $D \setminus D_j$ .  
 626 Then, by Eq. (9), for  $i \in R_j$ , we observe that the  $i$ th row of  $(\mathbf{C}\mathbf{x} + \mathbf{z})_{R_j}$  corresponds to an (adaptive)  
 627 query made with  $\ell_2$ -sensitivity  $\mathbf{e}_i^\top \mathbf{C}\mathbf{e}_j$  to the examples used in round  $j$ , i.e., those given by  $D_j$   
 628 and  $S_j$ , and noise  $N(0, \sigma^2)^d$ . So  $(\mathbf{C}\mathbf{x} + \mathbf{z})_{R_j}$  corresponds to a sequence of adaptive queries on the  
 629 examples used in round  $j$ , and answering this sequence of queries satisfies any standard privacy  
 630 guarantee satisfied by answering a single (scalar, adaptively chosen) query with sensitivity  $\|\mathbf{C}\mathbf{e}_j\|_2$   
 631 to the example chosen in round  $j$  and noise  $N(0, \sigma^2)$  by Claim D.1 in [17].

632 The same logic applies to each of  $(\mathbf{C}\mathbf{x} + \mathbf{z})_{R_{b+j}}, \dots, (\mathbf{C}\mathbf{x} + \mathbf{z})_{R_{(k-1)b+j}}$ . Putting it all together  
 633 and taking a max over the sensitivity of the individual queries, releasing  $\mathbf{C}\mathbf{x} + \mathbf{z}$  satisfies any  
 634 standard privacy guarantee satisfied by answering  $k$  adaptively chosen queries, with sensitivity  
 635  $\max_{i \in [n]} \|\mathbf{C}\mathbf{e}_i\|_2$  to the examples used in rounds  $j, b+j, \dots, (k-1)b+j$  respectively. This is  
 636 exactly Algorithm 6 with the specified choice of  $\Delta, \mathcal{S}$ .  $\square$

**E.3 Corollaries of Thm. 4**

638 We give here several corollaries of Thm. 4 that are of interest.

639 **Equivalence to DP-SGD:** Note that when  $b = 1$ , the partition contains a single subset, i.e., is the  
 640 entire dataset. In particular, in this setting Thm. 4 recovers the privacy guarantees of amplified  
 641 DP-SGD under any amplification scheme, e.g. including the ones discussed below.

642 **Amplification via sampling:** Take the distribution over  $2^{[\tilde{m}]}$  given by including each element of  
 643  $[\tilde{m}]$  independently with probability  $q$ , and let  $\mathcal{S}$  be the product of this distribution with itself  $k$  times.  
 644 This is equivalent to the following: in round  $i$ , we include each element of  $D_{i \pmod b}$  independently  
 645 with probability  $q$ . In particular, within each  $D_j$ , we are just using sampling with replacement to

646 choose which elements to include in each round. From this we get the following corollary, which  
 647 allows us to reduce to a setting whose privacy guarantees are well-understood:

648 **Corollary E.1.** *Suppose the examples participating in round  $i$  of matrix factorization are chosen by*  
 649 *including each element of  $D_i \pmod{b}$  independently with probability  $q$ . Then the matrix factorization*  
 650 *mechanism satisfies any standard privacy guarantee satisfied by  $k$  adaptive scalar queries with*  
 651 *sensitivity  $\max_{i \in [n]} \|\mathbf{C}\mathbf{e}_i\|_2$  and noise  $N(0, \sigma^2)$ , with the  $i$ th query run on a batch given by sampling*  
 652 *each element of a  $m$ -element database with probability  $q$ .*

653 We next make this explicit in terms of the `dp_accounting` Python library [18]. Given  $n, m, b$   
 654 and a target per-round batch size  $B$ , we could write a `dp_accounting.DpEvent` capturing the  
 655 privacy guarantees of the matrix factorization mechanism as follows:

```
656 gaussian_event = dp_accounting.GaussianDpEvent(noise_multiplier)
657 q = B / math.floor(n / b)
658 sampled_event = dp_accounting.PoissonSampledDpEvent(
659     q, gaussian_event
660 )
661 composed_event = dp_accounting.SelfComposedDpEvent(
662     sampled_event, math.ceil(m / b)
663 )
```

664 **Example E.1.** *To give an example of the amplification guarantee, for simplicity assume  $n/b, m/b$*   
 665 *are integer. If all column norms in  $\mathbf{C}$  are 1, each row of  $\mathbf{x}$  has sensitivity 1, and each entry of  $\mathbf{z}$  has*  
 666 *standard deviation  $\sigma$ , then outputting  $\mathbf{C}\mathbf{x} + \mathbf{z}$  satisfies  $(\alpha, \frac{\alpha n}{2\sigma^2 b})$ -RDP.*

667 *Using Theorem 11 of [43] and Cor. E.1, for appropriate choice of  $\alpha$  and  $q$ , this improves to  $(\alpha, q^2 \cdot$   
 668  $\frac{2\alpha n}{\sigma^2 b})$ -RDP with amplification by sampling. In particular, if we have a target per-round batch size  $B$ ,  
 669 then we should choose  $q = \frac{Bb}{m}$ , and if this choice of  $q$  satisfies the conditions in [43] plugging this in  
 670 gives  $(\alpha, \frac{2\alpha B^2 bn}{\sigma^2 m^2})$ -RDP. Notice that  $b = 1$  recovers the privacy guarantees of DP-SGD with Poisson  
 671 sampling, and this privacy guarantee weakens as  $b$  increases.*

672 **Amplification via shuffling:** Fix a per-round batch size  $B$ . Then, suppose we shuffle the list of  
 673 examples, and cyclically iterate over batches of size  $B$  in this list as the sets of examples to use in  
 674 each round of matrix factorization. That is, we shuffle  $D$  into an ordered list  $d_1, d_2, \dots$ , and in round  
 675  $i$  use examples  $d_{(i-1)B+1 \pmod{m}}, d_{(i-1)B+2 \pmod{m}}, \dots, d_{iB \pmod{m}}$ .

676 For simplicity let's consider the case where  $m/(Bb)$  is integer. In particular, this means in this  
 677 shuffling scheme, each example appears once every  $m/B$  rounds, and for each of these rounds  $i, i$   
 678  $\pmod{b}$  is the same. Then this shuffling scheme is equivalent to the following: First, rather than  
 679 choose an arbitrary partition to apply Thm. 4, we choose a uniformly random partition into  $b$  subsets  
 680 of size  $m/b$ . Then, we choose  $\mathcal{S}$  to be the distribution giving by shuffling  $[m/b]$  and then cyclically  
 681 iterating over the shuffled list in batches of size  $B$ . Given this equivalence, we get the following:

682 **Corollary E.2.** *Suppose the examples in matrix factorization are chosen by shuffling  $D$  and then*  
 683 *iterating over batches of size  $B$ . If  $n/(Bb)$  is integer, then the matrix factorization mechanism*  
 684 *satisfies any standard privacy guarantee satisfied by  $k$  adaptive scalar queries with sensitivity*  
 685  $\max_{i \in [n]} \|\mathbf{C}\mathbf{e}_i\|_2$  *and noise  $N(0, \sigma^2)$ , with the examples in each query given by shuffling a dataset*  
 686 *of size  $m/b$  and cyclically iterating over this list in batches of size  $B$ .*

687 **Example E.2.** *Consider the simplified case where  $m = n$ , we choose a random permutation  $\pi$ , and in*  
 688 *round  $i$  query example  $d_{\pi(i)}$ . In this case, if all the column norms of  $\mathbf{C}$  are 1,  $\mathbf{x}$ 's rows have sensitivity*  
 689 *1, and  $\mathbf{z}$ 's entries have standard deviation  $\sigma = \mathcal{O}\left(\frac{\sqrt{\ln(1/\delta)}}{\epsilon}\right)$ , we get that  $\mathbf{C}\mathbf{x} + \mathbf{z}$  satisfies  $(\epsilon, \delta)$ -DP.*  
 690 *With e.g., the amplification for shuffled  $(\epsilon, \delta)$ -DP mechanisms given by Theorem 5.1 of [6] and Cor. E.2,*  
 691 *if  $\epsilon$  is a constant, we instead get that  $\mathbf{C}\mathbf{x} + \mathbf{z}$  satisfies  $\left(\epsilon \cdot \mathcal{O}\left(\sqrt{\frac{b \log(1/\delta)}{n}}\right), \delta \cdot \mathcal{O}\left(\frac{n \ln(1/\delta)}{b}\right)\right)$ -DP.*

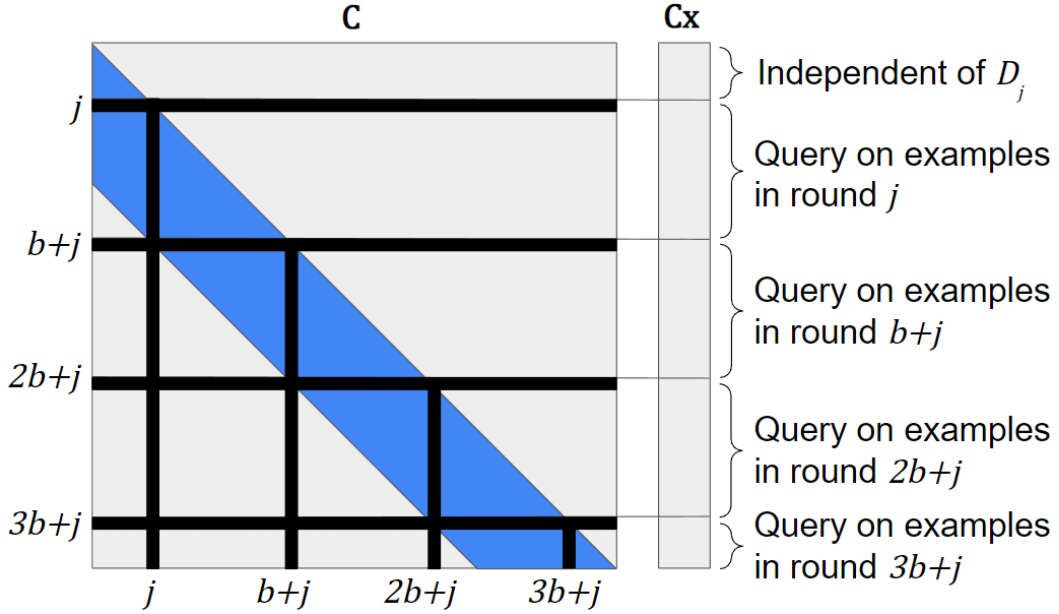

Figure 8: A visualization of how we can decompose a banded matrix mechanism into independent queries on  $D_j$  (as in Algorithm 6) under our sampling scheme.

## 693 F Additional RMSE Experiment Details

694 In this section, we provide more discussion and supplementary experiments surrounding the RMSE  
 695 experiments in Fig. 4. Table 3 shows the optimal number of bands for each  $(\epsilon, k)$  pair considered in  
 696 the RMSE experiments. It shows the general trend that as  $\epsilon$  decreases, or  $k$  increases, the optimal  
 697 number of bands decreases.

| $\epsilon/k$ | 1    | 2   | 4   | 8   | 16 | 32 | 64 | 128 | 256 | 512 | 1024 |
|--------------|------|-----|-----|-----|----|----|----|-----|-----|-----|------|
| 0.03125      | 2    | 2   | 1   | 1   | 1  | 1  | 1  | 1   | 1   | 1   | 1    |
| 0.0625       | 4    | 2   | 1   | 1   | 1  | 1  | 1  | 1   | 1   | 1   | 1    |
| 0.125        | 8    | 4   | 2   | 1   | 1  | 1  | 1  | 1   | 1   | 1   | 1    |
| 0.25         | 8    | 4   | 4   | 2   | 1  | 1  | 1  | 1   | 1   | 1   | 1    |
| 0.5          | 16   | 8   | 4   | 4   | 2  | 1  | 1  | 1   | 1   | 1   | 1    |
| 1.0          | 32   | 16  | 8   | 4   | 2  | 2  | 1  | 1   | 1   | 1   | 1    |
| 2.0          | 64   | 32  | 16  | 8   | 4  | 2  | 2  | 1   | 1   | 1   | 1    |
| 4.0          | 128  | 64  | 32  | 16  | 8  | 4  | 2  | 2   | 1   | 1   | 1    |
| 8.0          | 1024 | 512 | 256 | 32  | 16 | 8  | 4  | 2   | 2   | 1   | 1    |
| 16.0         | 1024 | 512 | 256 | 128 | 64 | 32 | 8  | 4   | 4   | 2   | 1    |

Table 3: Optimal number of bands for each  $(\epsilon, k)$  pair, when  $n = 1024$  and  $\delta = 10^{-6}$ .

## 698 G Additional CIFAR-10 Experiment Details

### 699 G.1 Setup and Tuning

700 We tune all jobs on a learning rate grid of coefficients in  $[1, 2, 5]$  on powers in  $[-2, 3]$ . We find that no  
 701 momentum works best for DP-SGD and momentum=0.95 works best for MF-DP-FTRL mechanisms  
 702 on average in tuning; though initial tuning found that tuning momentum as well could lead to slightly



703 better results at some  $\epsilon$  budgets, we found that a more refined grid of learning rates nearly always led  
 704 to a fixed momentum being optimal, and so we fix this parameter. We also found that a learning rate  
 705 cooldown to  $0.05 \times$  the initial learning rate over the last 500 steps of training improved all runs and  
 706 so we fix this parameter. All models trained for 20 epochs on CIFAR10 with a batch size of 500. We  
 707 repeat each setting 12 times and show 95% bootstrapped confidence intervals.

## 708 G.2 Additional Figures

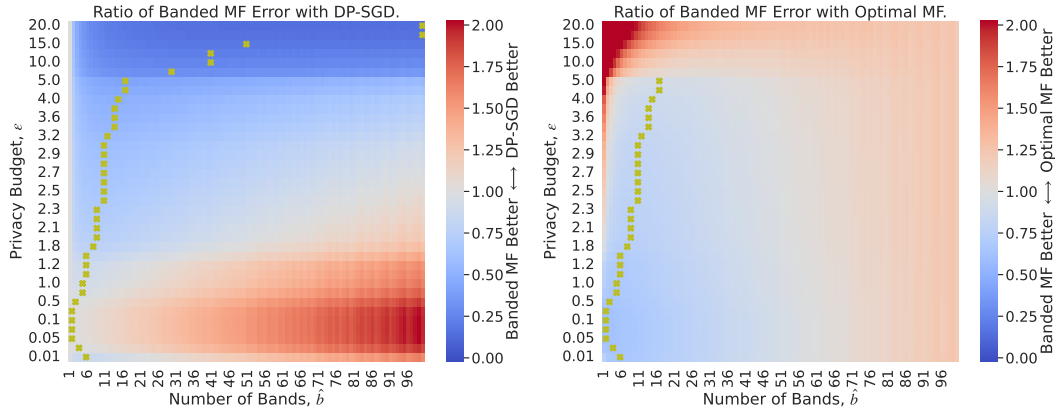

Figure 9: **BANDMF is at least as good as DP-SGD across all  $\epsilon$ , and often significantly better.** BANDMF is better than the prior MF-DP-FTRL from Choquette-Choo et al. [15] up to  $\epsilon \approx 5$ . We compare the ratio of the total error (see Sec. 4) of BANDMF with either mechanism. Lower values indicate that BANDMF is better. The yellow markers indicate the best BANDMF mechanism that was better for that  $\epsilon$  budget if one existed. Note that we only optimize the Band MF over  $\hat{b} \in [0, n/k]$  which leads to a regime around  $\epsilon > 5$  where the it performs worse than the Multi-epoch MF of Choquette-Choo et al. [15];  $\hat{b} = n$  is equivalent to this approach modulo the sensitivity definition which we exclude to emphasize the regime we improve on.

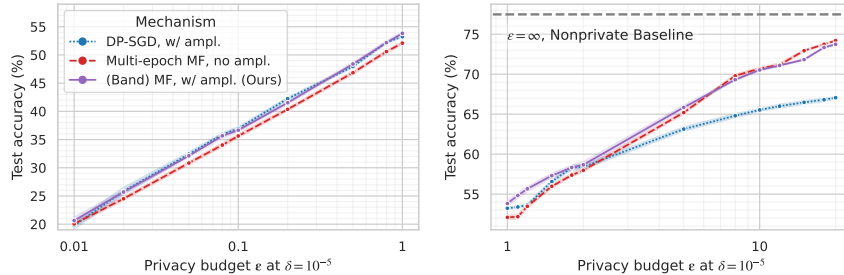

Figure 10: **Our banded matrices consistently perform at least as well as the best prior method in each range of  $\epsilon$ .** Around  $\epsilon \approx 1$ , we observe significant utility benefits from the banded mechanism around 2 – 3 percentage points over DP-SGD. Note that we only optimize the Band MF over  $\hat{b} \in [0, n/k]$  which leads to a regime around  $\epsilon > 5$  where the it performs worse than the Multi-epoch MF of Choquette-Choo et al. [15];  $\hat{b} = n$  is equivalent to this approach modulo the sensitivity definition which we exclude to emphasize the regime we improve on. Empirical setup is in App. G.

## 709 H Additional StackOverflow Next-Word-Prediction Experiment Details

710 We follow the experimental setup for StackOverflow NWP from Denisov et al. [17] and Choquette-  
 711 Choo et al. [15]. Except for SINGLE-EPOCH MF (which uses  $B = 167$  clients/round for 1 epoch),

712 all privacy guarantees and accuracy results are for 6 epochs of training using  $B = 1000$  clients/round  
 713 for 2052 rounds (also 1 epoch). The matrices used in these experiments are included in Table 2.

714 For computational efficiency in estimating model accuracy at a given privacy guarantee, we actually  
 715 compute in simulation updates from only 100 clients/round, and scale the noise multiplier by a  
 716 corresponding factor ( $\frac{100}{1000}$  for 6 epoch experiments,  $\frac{100}{167}$  for SINGLE-EPOCH MF). This approach  
 717 has been used previously [34, 41], and we independently verified it has a negligible impact on the  
 718 estimates of accuracy figures we report. Tables 4 and 5 include the unscaled noise multipliers  $\sigma$  for  
 719 our experiments.

720 **Optimizer and learning-rate tuning** For all SO NWP experiments we use the FedSGDM opti-  
 721 mizer [47]. This optimization approach first takes multiple local SGD steps (with learning rate 1.0  
 722 in our experiments) on the training data of each user in the batch (cohort) before clipping to  $\zeta = 1$ ,  
 723 summing, and passing the result  $\mathbf{x}_i$  into the DP mechanism which adds noise  $[\mathbf{C}^\dagger \mathbf{z}]_{[i,:]} \in \mathbb{R}^d$  on each  
 724 iteration  $i$ . The resulting privatized sum is then divided by the batch size  $B$  and passed to the “server”  
 725 (post-aggregation) optimizer, in our case SGDM with momentum parameter  $\beta = 0.95$  and learning  
 726 rate  $\eta_s$ . We find tuning  $\eta_s$  depending on the noise level is critical. By using the computationally  
 727 efficient approach mentioned above, we were able to conduct rigorous tuning over a learning rate  
 728 grid of  $1.7^i$  for powers  $i$  in  $\{-9, \dots, 4\}$ , estimating good initial guesses based on prior work. Table 6  
 729 gives the full set of results, and Fig. 12 shows convergence as a function of the number of rounds  
 730 (iters).

731 **Learning rate warmup and cooldown** Denisov et al. [17] found learning rate cooldown was  
 732 effective, and Choquette-Choo et al. [15] found that zeroing-out client updates with large  $\ell_\infty$  norms  
 733 was critical to stability in early training. We find that additionally introducing a learning-rate warmup  
 734 schedule reduces the need for this zeroing-out (though we still enable it), and generally decreases the  
 735 variance in training results. Hence, all of our experiments (for all algorithms) using a linear learning  
 736 rate warmup from  $0.05\eta_s$  to  $1.0\eta_s$  over the first 15% of rounds (309), and a linear decay from  $1.0\eta_s$   
 737 to  $0.05\eta_s$  over the last 25% of rounds (513).

738 **Using RMSE to tune select optimal server learning rates** Fig. 11 plots the server learning rates  
 739  $\eta_s$  from Table 6 on the  $y$ -axis (with the optimal rates shown as larger symbols, and sub-optimal rates  
 740 as small symbols, versus two different measures of the error for the DP mechanism on the  $x$ -axis:  
 741 The left plot gives uses the effective prefix-sum RMSE (the objective we use for optimizing (banded)  
 742 matrices  $\mathbf{C}$ ),

$$(Mechanism\ error) \times noise\text{-multiplier}/(clients\text{-per-round}) = \sqrt{\mathcal{L}(\mathbf{S}\mathbf{C}^{-1}, \mathbf{C})/n} \times \sigma/B, \quad (10)$$

743 where  $\mathbf{S}$  is the prefix-sum workload (lower-triangular matrix of ones) and  $\sigma$  and  $B$  are as given in  
 744 Table 4. The right plot uses the RMSE in error of individual gradients, computed by replacing the  $\mathcal{L}$   
 745 term in the above with  $\mathcal{L}(\mathbf{I}\mathbf{C}^{-1}, \mathbf{C})$  where we take the workload  $\mathbf{A}$  to be the identity matrix  $\mathbf{I}$  rather  
 746 than the prefix sum matrix  $\mathbf{S}$ .

747 We see a strong linear correlation between the prefix-sum RMSE and optimal learning rate in the left  
 748 plot; this does not hold for individual gradient errors (right plot). Based on this, we use the following  
 749 linear regression to choose learning rates for the non-federated (amplified) SO NWP experiments  
 750 (still rounding to the nearest  $1.7^i$  for consistency):

$$\log(\eta_s) = -0.95 \cdot \log(L_e) - 4.64$$

751 This allowed us to estimate learning rates for the amplified experiments with a high degree of  
 752 accuracy; Table 7 gives the final selected learning rates.

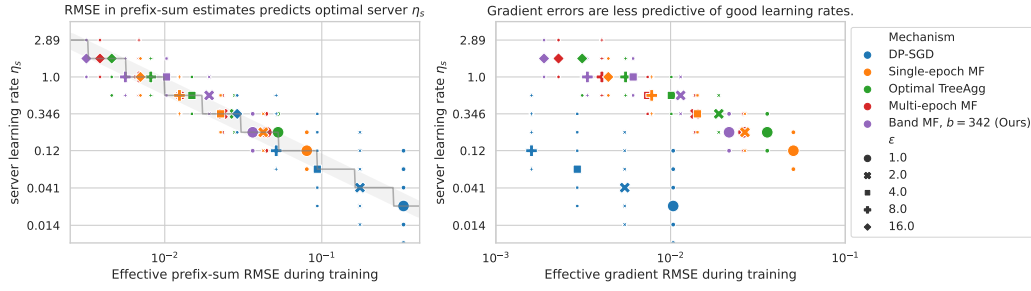

Figure 11: Correlation between optimal server learning rates  $\eta_s$  and the effective RMSE during training, see Eq. (10).

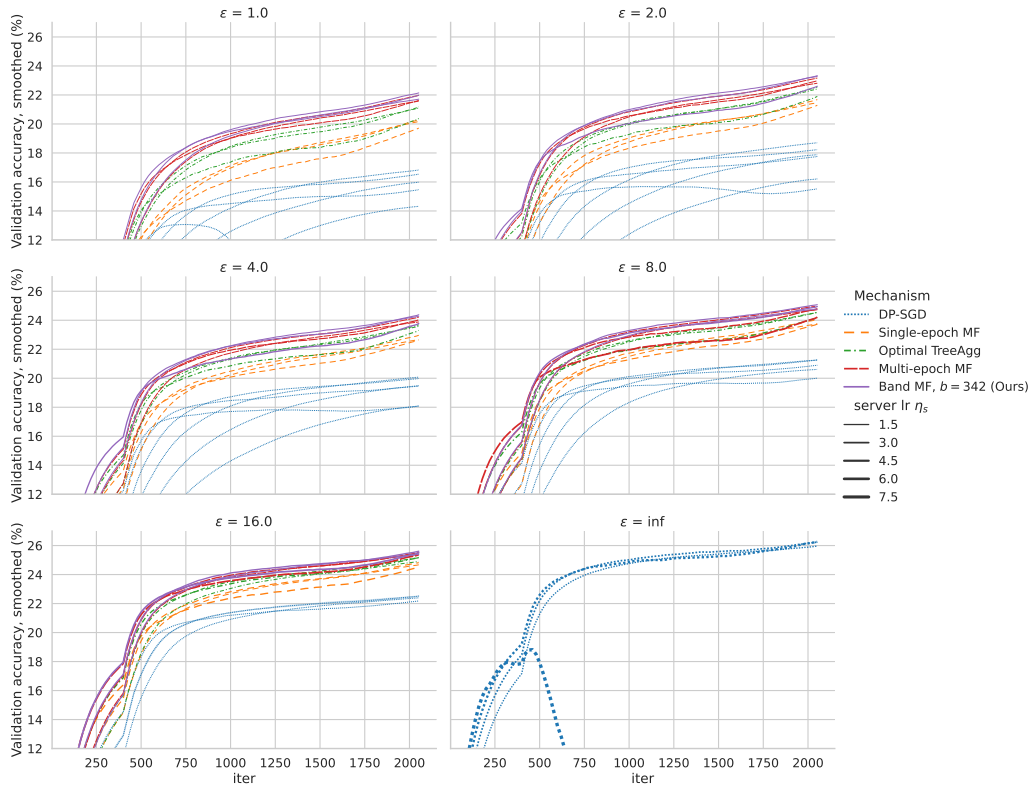

Figure 12: Convergence plots for all cross-device federated learning simulation experiments.

| Mechanism       | clients per round $B$ | $\epsilon$ | noise mult. $\sigma$ | server lr $\eta_s$ | Eval Accuracy (% , Smoothed) | Test Accuracy (%) |
|-----------------|-----------------------|------------|----------------------|--------------------|------------------------------|-------------------|
| DP-SGD          | 1000                  | 1          | 4.22468              | 0.0244             | 16.82                        | 16.69             |
| Single-epoch MF | 167                   | 1          | 4.22468              | 0.1197             | 20.29                        | 20.44             |
| Optimal TreeAgg | 1000                  | 1          | 4.22468              | 0.2035             | 21.15                        | 21.25             |
| Multi-epoch MF  | 1000                  | 1          | 4.76079              | 0.2035             | 21.96                        | 21.92             |
| Band MF (Ours)  | 1000                  | 1          | 4.22468              | 0.2035             | 22.12                        | 22.05             |
| DP-SGD          | 1000                  | 2          | 2.23048              | 0.0414             | 18.70                        | 18.42             |
| Single-epoch MF | 167                   | 2          | 2.23048              | 0.2035             | 21.66                        | 21.70             |
| Optimal TreeAgg | 1000                  | 2          | 2.23048              | 0.3460             | 22.52                        | 22.59             |
| Multi-epoch MF  | 1000                  | 2          | 2.51352              | 0.3460             | 23.15                        | 23.04             |
| Band MF (Ours)  | 1000                  | 2          | 2.23048              | 0.5882             | 23.31                        | 23.19             |
| DP-SGD          | 1000                  | 4          | 1.19352              | 0.0704             | 20.07                        | 19.81             |
| Single-epoch MF | 167                   | 4          | 1.19352              | 0.3460             | 22.94                        | 22.90             |
| Optimal TreeAgg | 1000                  | 4          | 1.19352              | 0.5882             | 23.66                        | 23.62             |
| Multi-epoch MF  | 1000                  | 4          | 1.34498              | 0.5882             | 24.19                        | 24.02             |
| Band MF (Ours)  | 1000                  | 4          | 1.19352              | 1.0000             | 24.35                        | 24.16             |
| DP-SGD          | 1000                  | 8          | 0.65294              | 0.1197             | 21.26                        | 21.08             |
| Single-epoch MF | 167                   | 8          | 0.65293              | 0.5882             | 24.03                        | 23.88             |
| Optimal TreeAgg | 1000                  | 8          | 0.65294              | 1.0000             | 24.54                        | 24.45             |
| Multi-epoch MF  | 1000                  | 8          | 0.73579              | 1.0000             | 24.95                        | -                 |
| Band MF (Ours)  | 1000                  | 8          | 0.65294              | 1.0000             | 25.06                        | 24.88             |
| DP-SGD          | 1000                  | 16         | 0.36861              | 0.3460             | 22.51                        | 22.26             |
| Single-epoch MF | 167                   | 16         | 0.36861              | 1.0000             | 24.80                        | 24.62             |
| Optimal TreeAgg | 1000                  | 16         | 0.36861              | 1.7000             | 25.15                        | 25.14             |
| Multi-epoch MF  | 1000                  | 16         | 0.41539              | 1.7000             | 25.50                        | 25.33             |
| Band MF (Ours)  | 1000                  | 16         | 0.36861              | 1.7000             | 25.59                        | 25.41             |

Table 4: Parameters and metrics for Fig. 5[a]. The noise multipliers are calibrated to achieve the given  $\epsilon$  guarantees at  $\delta=10^{-6}$  under  $b=342$ -min-separation. The matrices are scaled to have sensitivity 1 under  $(k=6, b=342)$ , see Table 2, and so a larger noise multiplier  $\sigma$  is necessary for the MULTI-EPOCH MF matrices. Test-set accuracy for MULTI-EPOCH MF at  $\epsilon = 8$  was unavailable.

| Mechanism                  | clients per round $B$ | $\epsilon$ | noise mult. $\sigma$ | server lr $\eta_s$ | Eval Accuracy (% , Smoothed) | Test Accuracy (%) |
|----------------------------|-----------------------|------------|----------------------|--------------------|------------------------------|-------------------|
| DP-SGD, w/ ampl.           | 1000                  | 1          | 0.37313              | 0.3460             | 22.50                        | 22.22             |
| Multi-epoch MF, no ampl.   | 1000                  | 1          | 4.22468              | 0.2035             | 22.11                        | 22.10             |
| (Band) MF, w/ ampl. (Ours) | 1000                  | 1          | 0.79118              | 0.3460             | 23.11                        | 22.83             |
| DP-SGD, w/ ampl.           | 1000                  | 2          | 0.30481              | 0.3460             | 22.89                        | 22.62             |
| Multi-epoch MF, no ampl.   | 1000                  | 2          | 2.23048              | 0.3460             | 23.36                        | 23.24             |
| (Band) MF, w/ ampl. (Ours) | 1000                  | 2          | 0.64708              | 0.5882             | 24.01                        | 23.71             |
| DP-SGD, w/ ampl.           | 1000                  | 4          | 0.25136              | 0.3460             | 23.27                        | 22.94             |
| Multi-epoch MF, no ampl.   | 1000                  | 4          | 1.19352              | 0.5882             | 24.36                        | 24.16             |
| (Band) MF, w/ ampl. (Ours) | 1000                  | 4          | 0.52224              | 1.0000             | 24.67                        | 24.42             |
| DP-SGD, w/ ampl.           | 1000                  | 8          | 0.20567              | 0.5882             | 23.59                        | 23.30             |
| Multi-epoch MF, no ampl.   | 1000                  | 8          | 0.65294              | 1.0000             | 25.08                        | 24.88             |
| (Band) MF, w/ ampl. (Ours) | 1000                  | 8          | 0.43490              | 1.7000             | 25.26                        | 24.99             |
| DP-SGD, w/ ampl.           | 1000                  | 16         | 0.16876              | 0.5882             | 23.96                        | 23.61             |
| Multi-epoch MF, no ampl.   | 1000                  | 16         | 0.36861              | 1.7000             | 25.59                        | 25.43             |
| (Band) MF, w/ ampl. (Ours) | 1000                  | 16         | 0.36861              | 1.7000             | 25.59                        | 25.43             |

Table 5: Parameters and metrics for Fig. 1(b). The noise multipliers are calibrated to achieve the given  $\epsilon$  guarantees at  $\delta=10^{-6}$  under  $(k=6, b=342)$ -participation, assuming Poisson sampling for DP-SGD and BANDMF.

|            |                         | Eval Accuracy (% , Smoothed) |          |              |              |              |              |              |              |              |              |              |        |        |              |        |        |
|------------|-------------------------|------------------------------|----------|--------------|--------------|--------------|--------------|--------------|--------------|--------------|--------------|--------------|--------|--------|--------------|--------|--------|
|            |                         | server lr                    | $\eta_s$ | 0.0084       | 0.0143       | 0.0244       | 0.0414       | 0.0704       | 0.1197       | 0.2035       | 0.3460       | 0.5882       | 1.0000 | 1.7000 | 2.8900       | 4.9130 | 8.3521 |
| $\epsilon$ | Mechanism               |                              |          |              |              |              |              |              |              |              |              |              |        |        |              |        |        |
| 1.0        | DP-SGD                  | 14.31                        | 15.98    | <b>16.82</b> | 16.53        | 15.46        | 4.67         | -            | -            | -            | -            | -            | -      | -      | -            | -      | -      |
|            | Single-epoch MF         | -                            | -        | -            | -            | 20.16        | <b>20.29</b> | 19.68        | -            | -            | -            | -            | -      | -      | -            | -      | -      |
|            | Optimal TreeAgg         | -                            | -        | -            | -            | -            | 21.08        | <b>21.15</b> | 20.34        | -            | -            | -            | -      | -      | -            | -      | -      |
|            | Multi-epoch MF          | -                            | -        | -            | -            | -            | 21.56        | <b>21.96</b> | 21.60        | -            | -            | -            | -      | -      | -            | -      | -      |
|            | Band MF, $b=342$ (Ours) | -                            | -        | -            | -            | -            | 21.70        | <b>22.12</b> | 21.96        | -            | -            | -            | -      | -      | -            | -      | -      |
| 2.0        | DP-SGD                  | -                            | 16.20    | 17.88        | <b>18.70</b> | 18.22        | 17.75        | 15.52        | -            | -            | -            | -            | -      | -      | -            | -      | -      |
|            | Single-epoch MF         | -                            | -        | -            | -            | -            | 21.46        | <b>21.66</b> | 21.26        | -            | -            | -            | -      | -      | -            | -      | -      |
|            | Optimal TreeAgg         | -                            | -        | -            | -            | -            | -            | 22.40        | <b>22.52</b> | 21.87        | -            | -            | -      | -      | -            | -      | -      |
|            | Multi-epoch MF          | -                            | -        | -            | -            | -            | -            | 22.80        | <b>23.15</b> | 22.96        | -            | -            | -      | -      | -            | -      | -      |
|            | Band MF, $b=342$ (Ours) | -                            | -        | -            | -            | -            | -            | -            | 23.27        | <b>23.31</b> | 22.57        | -            | -      | -      | -            | -      | -      |
| 4.0        | DP-SGD                  | -                            | -        | 18.08        | 19.45        | <b>20.07</b> | 19.97        | 19.48        | 18.08        | -            | -            | -            | -      | -      | -            | -      | -      |
|            | Single-epoch MF         | -                            | -        | -            | -            | -            | -            | 22.66        | <b>22.94</b> | 22.60        | -            | -            | -      | -      | -            | -      | -      |
|            | Optimal TreeAgg         | -                            | -        | -            | -            | -            | -            | -            | 23.57        | <b>23.66</b> | 23.27        | -            | -      | -      | -            | -      | -      |
|            | Multi-epoch MF          | -                            | -        | -            | -            | -            | -            | -            | 23.87        | <b>24.19</b> | 24.01        | -            | -      | -      | -            | -      | -      |
|            | Band MF, $b=342$ (Ours) | -                            | -        | -            | -            | -            | -            | -            | -            | 24.26        | <b>24.35</b> | 23.74        | -      | -      | -            | -      | -      |
| 8.0        | DP-SGD                  | -                            | -        | -            | -            | 20.61        | <b>21.26</b> | 21.24        | 20.89        | 20.00        | -            | -            | -      | -      | -            | -      | -      |
|            | Single-epoch MF         | -                            | -        | -            | -            | -            | -            | -            | 23.73        | <b>24.03</b> | 23.71        | -            | -      | -      | -            | -      | -      |
|            | Optimal TreeAgg         | -                            | -        | -            | -            | -            | -            | -            | -            | 24.52        | <b>24.54</b> | 24.15        | -      | -      | -            | -      | -      |
|            | Multi-epoch MF          | -                            | -        | -            | -            | -            | -            | -            | -            | 24.72        | <b>24.95</b> | 24.77        | 24.17  | -      | -            | -      | -      |
|            | Band MF, $b=342$ (Ours) | -                            | -        | -            | -            | -            | -            | -            | -            | 24.76        | <b>25.06</b> | 24.92        | -      | -      | -            | -      | -      |
| 16.0       | DP-SGD                  | -                            | -        | -            | -            | -            | -            | 22.39        | <b>22.51</b> | 22.17        | -            | -            | -      | -      | -            | -      | -      |
|            | Single-epoch MF         | -                            | -        | -            | -            | -            | -            | -            | -            | 24.66        | <b>24.80</b> | 24.50        | -      | -      | -            | -      | -      |
|            | Optimal TreeAgg         | -                            | -        | -            | -            | -            | -            | -            | -            | 24.89        | 25.15        | <b>25.15</b> | -      | -      | -            | -      | -      |
|            | Multi-epoch MF          | -                            | -        | -            | -            | -            | -            | -            | -            | -            | 25.38        | <b>25.50</b> | 25.34  | -      | -            | -      | -      |
|            | Band MF, $b=342$ (Ours) | -                            | -        | -            | -            | -            | -            | -            | -            | -            | 25.38        | <b>25.59</b> | 25.47  | -      | -            | -      | -      |
| inf        | DP-SGD                  | -                            | -        | -            | -            | -            | -            | -            | -            | -            | -            | -            | 25.96  | 26.23  | <b>26.24</b> | 8.03   | -      |

Table 6: **Federated learning rate tuning for StackOverflow NWP.** Validation accuracy smoothed over the final 400 rounds of training, used to select the best server learning rates for the comparison of test-set accuracy presented in Fig. 5[a].

|             |                                           | Eval Accuracy (% , Smoothed) |              |              |              |              |              |        |        |
|-------------|-------------------------------------------|------------------------------|--------------|--------------|--------------|--------------|--------------|--------|--------|
| $\epsilon$  | server lr $\eta_s$<br>Mechanism           | 0.1197                       | 0.2035       | 0.3460       | 0.5882       | 1.0000       | 1.7000       | 2.8900 | 4.9130 |
| <b>1.0</b>  | <b>DP-SGD</b>                             | -                            | 22.39        | <b>22.50</b> | 22.03        | -            | -            | -      | -      |
|             | <b>Multi-epoch MF</b>                     | 21.75                        | <b>22.11</b> | 21.95        | -            | -            | -            | -      | -      |
|             | <b>Band MF, <math>b=9</math> (Ours)</b>   | -                            | 22.83        | <b>23.11</b> | 23.03        | -            | -            | -      | -      |
| <b>2.0</b>  | <b>DP-SGD</b>                             | -                            | 22.70        | <b>22.89</b> | 22.66        | -            | -            | -      | -      |
|             | <b>Multi-epoch MF</b>                     | -                            | 22.89        | <b>23.36</b> | 23.26        | -            | -            | -      | -      |
|             | <b>Band MF, <math>b=18</math> (Ours)</b>  | -                            | -            | 23.80        | <b>24.01</b> | 23.77        | -            | -      | -      |
| <b>4.0</b>  | <b>DP-SGD</b>                             | -                            | 22.88        | <b>23.27</b> | 23.20        | -            | -            | -      | -      |
|             | <b>Multi-epoch MF</b>                     | -                            | -            | 23.96        | <b>24.36</b> | 24.22        | 23.71        | -      | -      |
|             | <b>Band MF, <math>b=32</math> (Ours)</b>  | -                            | -            | -            | 24.52        | <b>24.67</b> | 24.43        | -      | -      |
| <b>8.0</b>  | <b>DP-SGD</b>                             | -                            | -            | 23.48        | <b>23.59</b> | 23.28        | -            | -      | -      |
|             | <b>Multi-epoch MF</b>                     | -                            | -            | -            | 24.79        | <b>25.08</b> | 24.98        | 24.55  | -      |
|             | <b>Band MF, <math>b=64</math> (Ours)</b>  | -                            | -            | -            | -            | 25.15        | <b>25.26</b> | 24.79  | -      |
| <b>16.0</b> | <b>DP-SGD</b>                             | -                            | -            | 23.85        | <b>23.96</b> | 23.72        | -            | -      | -      |
|             | <b>Multi-epoch MF</b>                     | -                            | -            | -            | -            | 25.42        | <b>25.59</b> | 25.50  | 24.92  |
|             | <b>Band MF, <math>b=342</math> (Ours)</b> | -                            | -            | -            | -            | 25.37        | <b>25.55</b> | 25.45  | 24.90  |
|             | <b>Band MF, <math>b=64</math> (Ours)</b>  | -                            | -            | -            | -            | 25.38        | <b>25.54</b> | 25.40  | -      |

Table 7: **Centralized learning rate tuning for StackOverflow NWP.** Validation accuracy smoothed over the final 400 rounds of training, used to select the best server learning rates for the comparison of test-set accuracy presented in Fig. 1(b). DP-SGD and BANDMF use amplification.

---

**Algorithm 7** Banded Matrix Multiplication

---

**Input:**  $\hat{b}$ -Banded lower triangular matrix  
 $\mathbf{C} \in \mathbb{R}^{n \times n}$ , vector  $\mathbf{x} \in \mathbb{R}^n$   
**Output:**  $\mathbf{C}\mathbf{x}$   
**for**  $i = 1, \dots, n$  **do**  
     $\mathbf{y}_i = \sum_{j=i-\hat{b}+1}^i \mathbf{C}_{[i,j]} \mathbf{x}_j$   
**return**  $\mathbf{y}$

---

---

**Algorithm 8** Banded Inverse Multiplication

---

**Input:**  $\hat{b}$ -Banded lower triangular matrix  
 $\mathbf{C} \in \mathbb{R}^{n \times n}$ , vector  $\mathbf{y} \in \mathbb{R}^n$   
**Output:**  $\mathbf{C}^{-1}\mathbf{y}$   
**for**  $i = 1, \dots, n$  **do**  
     $\mathbf{x}_i = (\mathbf{y}_i - \sum_{j=i-\hat{b}+1}^{i-1} \mathbf{C}_{[i,j]} \mathbf{x}_j) / \mathbf{C}_{[i,i]}$   
**return**  $\mathbf{x}$

---

Figure 13: Algorithms for matrix-vector and inverse matrix-vector multiplication by a banded matrix. To simplify the presentation, we use the convention that out-of-bounds indexing into a matrix or vector returns 0.

## 753 I Efficient Multiplication and Inverse of Banded Matrices

754 Algorithms 7 and 8 (Fig. 13) give algorithms for lower triangular banded matrix-vector multiplication  
755 and inverse banded matrix-vector multiplication. Note that both algorithms are compatible with the  
756 streaming nature of gradients. As soon as the next input  $\mathbf{x}_i$  is received, the algorithm can immediately  
757 output  $\mathbf{y}_i$ . Both algorithms require storing a state of size  $\hat{b}$ , and run in  $O(n \cdot \hat{b})$  time. While the  
758 algorithms are described with respect to computing matrix-vector products, they can also be used to  
759 compute matrix-matrix products where the right-hand-side is a  $n \times d$  matrix by multiplying by each  
760 column independently. In this setting, these algorithms require  $O(\hat{b} \cdot d)$  space and  $O(n \cdot \hat{b} \cdot d)$  time.  
761 Both algorithms have appeared previously in the literature on Monte Carlo methods, which have a  
762 similar problem at their core to that of noise generation for MF; see e.g. [51, Section 2].

## 763 J Application to a Real-World Cross-Device FL System

764 We train a one-layer LSTM language model of  $\sim 2.4$  million parameters in a practical cross-device FL  
765 system. The model is used for predicting the next word of Spanish in a mobile virtual keyboard. We  
766 pretrain the model on public multilingual C4 dataset [46, 53], and then fine-tune with on-device user  
767 data in FL. In a common practical FL system, clients have to satisfy criteria like being charged, idle  
768 and connected to unmetered network to participate in a round [10, 26, 30, 44], hence only a subset  
769 of clients can be reached and there is a strong diurnal pattern of client participation [54, 57]. It is  
770 very challenging to hold a fixed set of clients for evaluation, or develop random sampling for privacy  
771 amplification.

### 772 J.1 Reporting privacy guarantees

773 We follow the guidelines outlined in [45, Sec. 5.3] to report privacy guarantees.

- 774 1. **DP setting.** This a central DP guarantee where the service provider is trusted to correctly  
775 implement the mechanism.
- 776 2. **Instantiating the DP Definition**
  - 777 (a) *Data accesses covered:* The DP guarantee applies to all well-behaved clients <sup>7</sup> in a  
778 single training run. We do not account for hyperparameter tuning in our guarantees. Public multilingual C4 data [53] is used for pre-training.
  - 779 (b) *Final mechanism output:* Only the final model checkpoint is released for use in pro-  
780 duction, however the mechanism’s output is technically the full sequence of privatized  
781 gradients, and so the guarantee also applies at this level, and hence all intermedi-  
782 ate models are protected (including those sent to devices participating in federated  
783 learning).
  - 784 (c) *Unit of privacy.* Device-level DP is considered, i.e., the notion of adjacency is with  
785 respect to arbitrary training datasets on each client device, and the device might have  
786 an arbitrarily large local dataset containing arbitrary training examples. For user’s with  
787

---

<sup>7</sup>Clients that faithfully follow the algorithm including participation limits. Due to the design of the algorithm, a mis-behaved client does not adversely affect the DP guarantee of any well-behaved clients.



788  
789  
790  
791  
792  
793  
794  
795  
796  
797  
798  
799  
800  
801  
802  
803  
804  
805  
806  
807  
808  
809  
810

a single device, this corresponds directly to user-level DP; for devices shared with multiple users, this provides a stronger notion of DP than user-level; for a user with multiple devices that happen to both participate in training the model, the notion is weaker, but group privacy can be used to obtain a user-level guarantee.

- (d) *Adjacency definition for “neighbouring” datasets*: We use the zero-out definition [34]. This is a special form of the add-or-remove definition, where neighboring data sets differ by addition/removal of a single client. In the absence of a client at any training step, we assume that the client’s model update gets replaced with the all zeros vector. This assumption enforces a subtle modification to the traditional definition of the add/remove notion of DP which allows neighboring data sets to have the same number of records.

### 3. Privacy accounting details

- (a) *Type of accounting used*: Both  $\rho$ -zCDP [11] accounting, and PLD accounting [18] for  $(\epsilon, \delta)$ -DP are used.
- (b) *Accounting assumptions* : Each client only participates limited times during the training, and there are at least a min-separation of  $b$  rounds between two consecutive participation of a client. This is enforced by a timer on clients in the cross-device FL system.
- (c) *The formal DP statement*: The privacy guarantees are  $\rho=0.52$ -zCDP and  $(\epsilon=6.69, \delta=10^{-10})$ -DP for ONLINE TREEAGG, while BANDMF achieves  $\rho=0.24$ -zCDP and  $(\epsilon=4.35, \delta=10^{-10})$ -DP.
- (d) *Transparency and verifiability*: We are going to open source our code based on TensorFlow Federated and Tensorflow Privacy. Key portions of the cross-device FL system will also open sourced.
